# Supplementary material for: Profiles of Physical Fitness Risk Behaviours in School Adolescents from the ASSO Project: A Latent Class Analysis
Source: PubMed Central journal article supplement (PMC6163564; doi:10.3390/ijerph15091933), 2018-09-05
Supplement: ijerph-15-01933-s001.pdf [file ijerph-15-01933-s001.pdf]

**Supplementary Table S1.** Model fit statistics for the 2- to 6-class LCA models of fitness-related behaviours (N = 883).

|                   | <b>2 classes</b> | <b>3 classes</b> | <b>4 classes</b> | <b>5 classes</b> | <b>6 classes</b> |
|-------------------|------------------|------------------|------------------|------------------|------------------|
| Log likelihood    | -4818,2413       | -4783,3701       | -4739,7451       | -4698,5971       | -4680,8938       |
| G-squared         | 1205,4180        | 1135,6757        | 1048,4256        | 966,1297         | 930,7231         |
| AIC <sup>a</sup>  | 1255,4180        | 1211,6757        | 1150,4256        | 1094,1297        | 1084,7231        |
| BIC <sup>b</sup>  | 1375,7816        | 1394,6283        | 1395,9673        | 1402,2605        | 1455,4429        |
| CAIC <sup>c</sup> | 1400,7816        | 1432,6283        | 1446,9673        | 1466,2605        | 1532,4429        |
| Adjusted BIC      | 1296,3851        | 1273,9456        | 1233,9984        | 1199,0054        | 1210,9016        |

<sup>a</sup> AIC = Akaike's Information Criteria; <sup>b</sup> BIC = Bayesian Information Criteria; <sup>c</sup> CAIC = consistent version of AIC.
